# Supplementary material for: Demographic risk factors for COVID-19 infection, severity, ICU admission and death: a meta-analysis of 59 studies
Source: HighWire-hosted journal article supplement (doi:10.1136/bmjopen-2020-044640), 2021-01-01
Supplement: bmjopen-2020-044640supp002_data_supplement.pdf [file bmjopen-2020-044640supp002_data_supplement.pdf]

| Males vs females |                  |      |                |                     |         |      |                      |            |            |                       |        |                 |                       |                                   |
|------------------|------------------|------|----------------|---------------------|---------|------|----------------------|------------|------------|-----------------------|--------|-----------------|-----------------------|-----------------------------------|
|                  | Author           | RR   | country        | region              | City    | n    | publicati<br>on date | Start      | End        | recruitment<br>window | F<br>U | study<br>desing | clinical<br>setting   | Diagnostic<br>modality            |
| Infecti<br>on    | Zhu W            | 0,95 | China          | Anhui               |         | 116  | 10-mrt               | 24-jan     | 20-<br>feb | 27                    |        | cohort          | Hospital              | PCR                               |
|                  | Liu R a          | 1,1  | China          | Hubei               | Wuhan   | 4880 | 7-mrt                | 22-jan     | 14-<br>feb | 23                    |        | cohort          | Hospital              | PCR                               |
|                  | Ai T             | 1,05 | China          | Hubei               | Wuhan   | 1014 | 26-feb               | 6-jan      | 6-feb      | 31                    |        | cohort          | Hospital              | PCR                               |
|                  | Dong Y           | 1,03 | China          | multiple<br>regions |         | 2135 | 1-apr                |            | 8-feb      |                       |        | cohort          | General<br>population | PCR                               |
|                  | Chu J            | 0,86 | China          | Hubei               | Wuhan   | 54   | 29-mrt               | 7-jan      | 11-<br>feb | 35                    | 3<br>5 | cohort          | Hospital              | PCR                               |
|                  | Shen N           | 1,09 | China          | Hubei               | Wuhan   | 5630 | 30-apr               | 22-jan     | 18-<br>feb | 27                    | 2<br>7 | cohort          | Hospital              | PCR                               |
|                  | KDC Resp<br>Team | 1,95 | South<br>Korea |                     |         | 2370 |                      |            |            |                       | 4<br>6 | cohort          | General<br>population |                                   |
|                  | Long C           | 1,11 | China          | Hubei               | Yichang | 87   | 11-mrt               | 20-jan     | 8-feb      | 19                    |        | cohort          | Hospital              | laboratory tests ,<br>CT findings |
| severe           |                  |      |                |                     |         |      |                      |            |            |                       |        |                 |                       |                                   |
|                  | Guan W J a       | 0,99 | China          | Multiple<br>regions |         | 1096 | 28-feb               | 11-<br>dec | 29-<br>jan | 49                    | 5<br>1 | cohort          | Hospital              | PCR                               |
|                  | Gao Y            | 0,98 | China          | Anhui               | Fuyang  | 43   | 13-mrt               | 23-jan     | 2-feb      | 10                    |        | cohort          | Hospital              | PCR                               |
|                  | Li K             | 1,33 | China          | Chongqing and Jinan |         | 83   | 29-feb               | 1-jan      | 29-<br>feb | 29                    |        | cohort          | Hospital              | PCR                               |
|                  | Wan S            | 0,94 | China          | Northeast Chongqing |         | 135  | 22-apr               | 23-jan     | 8-feb      | 16                    | 1<br>6 | cohort          | Hospital              | PCR                               |
|                  | Wu J             | 1,01 | China          | Jiangsu, Anhui      |         | 280  | 27-mrt               | 20-jan     | 19-<br>feb | 30                    | 3<br>0 | cohort          | Hospital              | PCR                               |
|                  | Shi Y            | 2,44 | China          | Zhejiang            |         | 487  | 18-mrt               |            | 17-<br>feb |                       |        | cohort          | Hospital              |                                   |
|                  | Qin C            | 1,09 | China          | Hubei               | Wuhan   | 452  | 12-mrt               | 10-jan     | 12-<br>feb | 33                    |        | cohort          | Hospital              | PCR                               |
|                  | Tian S           | 1,38 | China          |                     | Beijing | 262  | 27-feb               | 20-jan     | 10-<br>feb | 21                    | 2<br>1 | cohort          | Hospital              | PCR                               |
|                  | Zhang J a        | 1,28 | China          | Hubei               | Wuhan   | 140  | 18-feb               | 16-jan     | 3-feb      | 18                    |        | cohort          | Hospital              | PCR                               |
|                  | Qian GQ          | 1,82 | China          | Zhejiang            |         | 91   | 17-mrt               | 20-jan     | 11-<br>feb | 22                    | 2<br>7 | cohort          | Hospital              | PCR                               |
|                  | Zhang G a        | 1,51 | China          | Hubei               | Wuhan   | 95   | 26-mrt               | 16-jan     | 25-<br>feb | 40                    | 4<br>6 | cohort          | Hospital              | PCR                               |

|  |            |      |       |             |          |      |        |        |        |    |    |        |          |     |
|--|------------|------|-------|-------------|----------|------|--------|--------|--------|----|----|--------|----------|-----|
|  | Wu C       | 1,43 | China | Wuhan       |          | 201  | 13-mrt | 25-dec | 26-jan | 32 | 50 | cohort | Hospital | PCR |
|  | Chen Q     | 0,96 | China | Zhejiang    | Taizhou  | 145  | 28-apr | 1-jan  | 11-mrt | 70 | 70 | cohort | Hospital | PCR |
|  | Liu Y      | 1,05 | China |             | Shanghai | 221  | 28-mei |        |        |    |    | cohort | Hospital | PCR |
|  | Chen T b   | 1,21 | China | Hubei       | Wuhan    | 203  | 7-apr  | 1-jan  | 10-feb | 40 | 50 | cohort | Hospital | PCR |
|  | Colaneri M | 1,86 | Italy | North Italy |          | 44   | 23-apr | 21-feb | 28-feb | 7  | 12 | cohort | Hospital | PCR |
|  | Chu J      | 1,15 | China | Wuhan       |          | 54   | 29-mrt | 7-jan  | 11-feb | 35 |    | cohort | Hospital | PCR |
|  | Wang X     | 1,52 | China | Wuhan       | Fangcang | 1012 | 27-mrt | 7-feb  | 12-feb | 5  | 15 | cohort | Hospital | PCR |
|  | Zhao X Y   | 0,75 | China | Jingzhou    |          | 91   | 29-apr | 16-jan | 10-feb | 25 | 25 | cohort | Hospital | PCR |
|  | Wang L b   | 1,01 | China | hubei       | Wuhan    | 116  | 31-mrt | 14-jan | 13-feb | 30 | 30 | cohort | Hospital | PCR |
|  | Zhu Z      | 0,71 | China | Zhejiang    | Ningbo   | 127  | 17-apr | 23-jan | 20-feb | 28 | 28 | cohort | Hospital | PCR |
|  | Zheng F    | 0,89 | China |             | Changsha | 161  |        | 17-jan | 7-feb  | 21 | 21 | cohort | Hospital | PCR |
|  | Zhang G b  | 1,83 | China | Hubei       |          | 221  | 5-apr  | 2-jan  | 10-feb | 39 | 44 | cohort | Hospital | PCR |
|  | Chen G     | 2,35 | China | Hubei       | Wuhan    | 21   | 27-mrt | 20-dec | 27-jan | 38 | 38 | cohort | Hospital | PCR |
|  | Wang R     | 1,35 | China | Anhui       | Fuyang   | 125  | 24-mrt | 20-jan | 8-feb  | 19 | 29 | cohort | Hospital | PCR |
|  | Zhang J c  | 1,07 | China | Hubei       | Wuhan    | 663  | 15-apr | 11-jan | 6-feb  | 26 |    | cohort | Hospital | PCR |
|  | Chen X     | 2,38 | China | Hubei       | Wuhan    | 48   | 17-apr | 1-feb  | 19-feb | 18 | 18 | cohort | Hospital | PCR |
|  | Zhang R    | 0,97 | China | Hubei       | Wuhan    | 120  | 1-apr  | 10-jan | 10-feb | 31 | 31 | cohort | Hospital | PCR |
|  | Wei J F    | 1,28 | China | Sichuan     |          | 103  | 6-apr  | 16-jan | 10-mrt | 54 |    | cohort | Hospital | PCR |
|  | Liu R b    | 0,99 | China | Hubei       |          | 119  | 31-mrt | 31-jan | 26-feb | 26 | 26 | cohort | Hospital | PCR |
|  | Lyu P      | 0,98 | China | Zhengzhou   |          | 51   | 17-apr | 15-jan | 24-feb | 40 | 40 | cohort | Hospital | PCR |
|  | Pei G      | 1,29 | China | Hubei       | Wuhan    | 333  | 12-apr | 28-jan | 9-feb  | 12 | 12 | cohort | Hospital | PCR |
|  | Yu X b     | 2,02 | China | Zhejiang    |          | 92   | 23-apr | 19-jan | 19-mrt | 60 | 60 | cohort | Hospital | PCR |
|  | Zheng S    | 1,28 | China | Zhejiang    |          | 96   | 6-apr  | 19-jan | 15-feb | 27 | 27 | cohort | Hospital | PCR |

|       |               |      |           |              |                                  |      |        |        |        |    |        |        |          |     |
|-------|---------------|------|-----------|--------------|----------------------------------|------|--------|--------|--------|----|--------|--------|----------|-----|
|       | Long L        | 1,75 | China     | Hubei        | Jingzhou city and Xiangyang city | 301  | 20-apr | 16-jan | 24-feb | 39 | 4<br>5 | cohort | Hospital | PCR |
| ICU   |               |      |           |              |                                  |      |        |        |        |    |        |        |          |     |
|       | Huang C       | 2,02 | China     | Hubei        | Wuhan                            | 41   | 24-jan | 16-dec | 2-jan  | 17 |        | cohort | Hospital | PCR |
|       | Wang D a      | 1,32 | China     |              | Wuhan                            | 138  | 7-feb  | 1-jan  | 28-jan | 27 | 3<br>3 | cohort | Hospital | PCR |
|       | Bingwen E F   | 1,62 | Singapore |              |                                  | 67   | 3-mrt  | 23-jan | 28-feb | 36 |        | cohort | Hospital | PCR |
|       | Zhang G a     | 1,41 | China     | Hubei        | Wuhan                            | 95   | 26-mrt | 16-jan | 25-feb | 40 | 4<br>6 | cohort | Hospital | PCR |
|       | Kalligeros M  | 1,23 | US        | Rhode Island |                                  | 103  | 30-apr | 17-feb | 5-apr  | 48 | 4<br>8 | cohort | Hospital | PCR |
|       | Wei J F       | 1,38 | China     | Sichuan      |                                  | 103  | 6-apr  | 16-jan | 10-mrt | 54 |        | cohort | Hospital | PCR |
|       | Myers L C     | 1,48 | US        | California   |                                  | 377  | 24-apr | 1-mrt  | 31-mrt | 30 | 3<br>9 | cohort | Hospital | PCR |
|       | Lyu P         | 0,55 | China     | Henan        | Zhengzhou                        | 51   | 17-apr | 15-jan | 24-feb | 40 | 4<br>0 | cohort | Hospital | PCR |
|       | Rieg S        | 2,12 | Germany   |              | Freiburg                         | 115  | 28-apr | 25-feb | 31-mrt | 35 | 3<br>5 | cohort | Hospital | PCR |
|       | Cao J         | 1,85 | China     | Hubei        | Wuhan                            | 102  | 2-mrt  | 3-jan  | 1-feb  | 29 | 4<br>3 | cohort | Hospital | PCR |
|       | Long L        | 2,24 | China     | Hubei        | Jingzhou city and Xiangyang city | 301  | 20-apr | 16-jan | 24-feb | 39 | 4<br>5 | cohort | Hospital | PCR |
| death |               |      |           |              |                                  |      |        |        |        |    |        |        |          |     |
|       | Tang N        | 2,78 | China     | Hubei        | Wuhan                            | 183  | 18-feb | 1-jan  | 3-feb  | 33 | 4<br>3 | cohort | Hospital | PCR |
|       | Tian S        | 2,13 | China     |              | Beijing                          | 262  | 27-feb | 20-jan | 10-feb | 21 | 2<br>1 | cohort | Hospital | PCR |
|       | Wu C          | 1,1  | China     | Hubei        | Wuhan                            | 201  | 13-mrt | 25-dec | 26-jan | 32 | 5<br>0 | cohort | Hospital | PCR |
|       | Chen T b      | 4,84 | China     | Hubei        | Wuhan                            | 203  | 7-apr  | 1-jan  | 10-feb | 40 | 5<br>0 | cohort | Hospital | PCR |
|       | Meng Y        | 1,56 | China     | Hubei        | Wuhan                            | 168  | 28-apr | 16-jan | 4-feb  | 19 | 6<br>4 | cohort | Hospital | PCR |
|       | Nikpouraghdam | 1,2  | Iran      |              | Teheran                          | 2968 | 19-apr | 19-feb | 15-apr | 56 | 7<br>3 | cohort | Hospital | PCR |
|       | Richardson    | 1,03 | US        | New York     |                                  | 5700 | 22-apr | 1-mrt  | 4-apr  | 34 | 3<br>4 | cohort | Hospital | PCR |
|       | Yan, Y        | 1,65 | China     | Hubei        | Wuhan                            | 193  | 6-apr  | 10-jan | 24-feb | 45 |        | cohort | Hospital | PCR |

|  |           |      |       |       |         |      |        |        |        |    |    |        |          |     |
|--|-----------|------|-------|-------|---------|------|--------|--------|--------|----|----|--------|----------|-----|
|  | Xu B      | 1,26 | China | Hubei | Wuhan   | 187  | 13-apr | 26-dec | 1-mrt  | 66 | 66 | cohort | Hospital | PCR |
|  | Zhang J c | 1,6  | China | Hubei | Wuhan   | 663  | 15-apr | 11-jan | 6-feb  | 26 |    | cohort | Hospital | PCR |
|  | Du R H    | 0,77 | China | Hubei | Wuhan   | 179  | 7-mei  | 25-dec | 7-feb  | 44 |    | cohort | Hospital |     |
|  | Yang R    | 5,15 | China | Hubei | Wuhan   | 212  | 24-apr | 11-jan | 16-mrt | 65 | 65 | cohort | Hospital | PCR |
|  | Chen R    | 2,69 | China |       |         | 1578 | 15-apr |        |        |    |    | cohort | Hospital | PCR |
|  | Tomlins J | 0,88 | UK    |       | Bristol | 95   | 30-apr | 10-mrt | 20-mrt | 10 | 27 | cohort | Hospital |     |

| Males vs females |                 |         |          |            | NOS             |                         |                   |                    |                        |                          |                   |                 |
|------------------|-----------------|---------|----------|------------|-----------------|-------------------------|-------------------|--------------------|------------------------|--------------------------|-------------------|-----------------|
| Author           | % comorbidi-tes | % males | mean age | % BMI > 25 | Case definition | Case representativeness | Control selection | control definition | exposure ascertainment | comparable ascertainment | non response rate | Overall quality |
| Infection        |                 |         |          |            |                 |                         |                   |                    |                        |                          |                   |                 |
| Zhu W            |                 | 56      | 40       | 23         | Acceptable      | Acceptable              | Acceptable        | Acceptable         | Acceptable             | Acceptable               | NA                | 9               |
| Liu R a          |                 | 46      |          |            | Acceptable      | Acceptable              | Acceptable        | Not acceptable     | Acceptable             | Acceptable               | NA                | 7               |
| Ai T             |                 | 46      | 51       |            | Acceptable      | Acceptable              | Acceptable        | Acceptable         | Acceptable             | Acceptable               | NA                | 9               |
| Dong Y           |                 | 57      | 7        |            | Acceptable      | Acceptable              | Acceptable        | Acceptable         | Acceptable             | Acceptable               | Unknown           | 8               |
| Chu J            |                 | 67      | 54       |            | Acceptable      | Acceptable              | Acceptable        | Acceptable         | Acceptable             | Acceptable               | acceptable        | 9               |
| Shen N           |                 | 47      | 49       |            | Acceptable      | Acceptable              | Acceptable        | Acceptable         | Acceptable             | Acceptable               | acceptable        | 9               |
| KDC Resp Team    |                 | 45      |          |            | Not Acceptable  | Acceptable              | Acceptable        | Acceptable         | Acceptable             | Acceptable               | NA                | 7               |
| Long C           |                 | 53      |          |            | Acceptable      | Not acceptable          | Acceptable        | Not acceptable     | Acceptable             | Acceptable               | NA                | 6               |
| Severe           |                 |         |          |            |                 |                         |                   |                    |                        |                          |                   |                 |
| Guan W J a       | 24              | 58      | 47       |            | Acceptable      | Acceptable              | Acceptable        | Acceptable         | Acceptable             | Acceptable               | NA                | 9               |
| Gao Y            |                 | 61      | 43       |            | Unknown         | Acceptable              | Acceptable        | Acceptable         | Unknown                | Acceptable               | NA                | 6               |
| Li K             | 18              | 53      | 45       |            | Acceptable      | Acceptable              | Acceptable        | Acceptable         | Acceptable             | Acceptable               | NA                | 9               |
| Wan S            | 32              | 53      | 47       |            | Acceptable      | Acceptable              | Acceptable        | Acceptable         | Acceptable             | Acceptable               | NA                | 9               |
| Wu J             |                 | 54      | 43       |            | Acceptable      | Acceptable              | Acceptable        | Acceptable         | Acceptable             | Acceptable               | NA                | 9               |
| Shi Y            |                 | 53      | 46       |            | Acceptable      | Acceptable              | Acceptable        | Acceptable         | Unknown                | unknown                  | NA                | 5               |
| Qin C            | 44              | 51      | 58       |            | Acceptable      | Acceptable              | Acceptable        | Acceptable         | Acceptable             | Acceptable               | acceptable        | 9               |
| Tian S           |                 | 49      | 48       |            | Acceptable      | Acceptable              | Acceptable        | Acceptable         | Acceptable             | Acceptable               | NA                | 9               |
| Zhang J a        | 64              | 51      | 57       |            | Acceptable      | Acceptable              | Acceptable        | Acceptable         | Acceptable             | Acceptable               | acceptable        | 8               |
| Qian GQ          |                 | 41      | 50       |            | Acceptable      | Acceptable              | Acceptable        | Acceptable         | Acceptable             | Acceptable               | NA                | 9               |
| Zhang G a        |                 | 56      | 49       |            | Acceptable      | Acceptable              | Acceptable        | Acceptable         | Acceptable             | Acceptable               | NA                | 9               |

|              |    |    |    |      |                |                |            |            |            |            |            |   |
|--------------|----|----|----|------|----------------|----------------|------------|------------|------------|------------|------------|---|
| Wu C         | 33 | 64 | 51 |      | Acceptable     | Acceptable     | Acceptable | Acceptable | Acceptable | Acceptable | NA         | 9 |
| Chen Q       |    | 55 | 48 |      | Acceptable     | Acceptable     | Acceptable | Acceptable | Acceptable | Acceptable | NA         | 9 |
| Liu Y        |    | 52 |    |      | Not acceptable | Acceptable     | Acceptable | Acceptable | Acceptable | Acceptable | NA         | 8 |
| Chen T b     | 42 | 53 | 55 |      | Acceptable     | Acceptable     | Acceptable | Acceptable | Acceptable | Acceptable | NA         | 9 |
| Colaneri M   | 64 | 64 | 60 |      | Acceptable     | Acceptable     | Acceptable | Acceptable | Acceptable | Acceptable | NA         | 8 |
| Chu J        |    | 67 | 54 |      | Acceptable     | Acceptable     | Acceptable | Acceptable | Acceptable | Acceptable | acceptable | 9 |
| Wang X       | 11 | 52 | 51 |      | Acceptable     | Acceptable     | Acceptable | Acceptable | Acceptable | Acceptable | NA         | 9 |
| Zhao X Y     | 23 | 54 | 46 |      | Acceptable     | Acceptable     | Acceptable | Acceptable | Acceptable | Acceptable | NA         | 7 |
| Wang L b     | 44 | 58 | 54 |      | Acceptable     | Acceptable     | Acceptable | Acceptable | Acceptable | Acceptable | unknown    | 8 |
| Zhu Z        | 41 | 35 | 51 | 24   | Acceptable     | Acceptable     | Acceptable | Acceptable | Acceptable | Acceptable | NA         | 9 |
| Zheng F      | 21 | 50 | 45 |      | Acceptable     | Acceptable     | Acceptable | Acceptable | Acceptable | Acceptable | NA         | 9 |
| Zhang G b    | 35 | 49 | 54 |      | Acceptable     | Acceptable     | Acceptable | Acceptable | Acceptable | Acceptable | NA         | 8 |
| Chen G       | 33 | 81 | 61 |      | Acceptable     | Acceptable     | Acceptable | Acceptable | Acceptable | Acceptable | NA         | 7 |
| Wang R       | 27 | 57 | 37 |      | Acceptable     | Acceptable     | Acceptable | Acceptable | Acceptable | Acceptable | unknown    | 9 |
| Zhang J c    | 37 | 48 | 56 |      | Acceptable     | Acceptable     | Acceptable | Acceptable | Acceptable | Acceptable | NA         | 9 |
| Chen X       |    | 77 | 65 |      | Acceptable     | Acceptable     | Acceptable | Acceptable | Acceptable | Acceptable | NA         | 7 |
| Zhang R      | 73 | 43 | 61 |      | Acceptable     | Acceptable     | Acceptable | Acceptable | Acceptable | Acceptable | NA         | 8 |
| Wei J F      |    | 54 | 49 |      | Acceptable     | Acceptable     | Acceptable | Acceptable | Acceptable | Acceptable | NA         | 9 |
| Liu R b      |    | 52 |    |      | Acceptable     | Acceptable     | Acceptable | Acceptable | Acceptable | Acceptable | NA         | 6 |
| Lyu P        | 33 | 56 | 54 |      | Acceptable     | Acceptable     | Acceptable | Acceptable | Acceptable | Acceptable | NA         | 6 |
| Pei G        |    | 55 | 56 |      | Acceptable     | Not Acceptable | Acceptable | Acceptable | Acceptable | Acceptable | NA         | 8 |
| Yu X b       |    | 62 | 55 |      | Not acceptable | Acceptable     | Acceptable | Acceptable | Acceptable | Acceptable | NA         | 5 |
| Zheng S      |    | 60 | 55 |      | Acceptable     | Acceptable     | Acceptable | Acceptable | Acceptable | Acceptable | NA         | 9 |
| Long L       |    | 50 | 50 |      | Acceptable     | Acceptable     | Acceptable | Acceptable | Acceptable | Acceptable | NA         | 9 |
|              |    |    |    |      |                |                |            |            |            |            |            |   |
| ICU          |    |    |    |      |                |                |            |            |            |            |            |   |
| Huang C      | 32 | 73 | 49 |      | Acceptable     | Acceptable     | Acceptable | Acceptable | Acceptable | Acceptable | NA         | 9 |
| Wang D a     | 46 | 54 | 57 |      | Acceptable     | Acceptable     | Acceptable | Acceptable | Acceptable | Acceptable | NA         | 9 |
| Bingwen E F  |    | 55 | 42 |      | Acceptable     | Acceptable     | Acceptable | Acceptable | Acceptable | Acceptable | NA         | 9 |
| Zhang G a    |    | 56 | 49 |      | Acceptable     | Acceptable     | Acceptable | Acceptable | Acceptable | Acceptable | NA         | 9 |
| Kalligeros M |    | 61 | 60 | 81,6 | Acceptable     | Acceptable     | Acceptable | Acceptable | Acceptable | Acceptable | NA         | 8 |
| Wei J F      |    | 54 | 49 |      | Acceptable     | Acceptable     | Acceptable | Acceptable | Acceptable | Acceptable | NA         | 9 |
| Myers L C    |    | 56 | 61 |      | Acceptable     | Acceptable     | Acceptable | Acceptable | Acceptable | Acceptable | Acceptable | 9 |
| Lyu P        | 33 | 57 | 54 |      | Acceptable     | Acceptable     | Acceptable | Acceptable | Acceptable | Acceptable | NA         | 6 |
| Rieg S       |    | 63 | 56 |      | Acceptable     | Acceptable     | Acceptable | Acceptable | Acceptable | Acceptable | NA         | 8 |
| Cao J        | 46 | 52 | 53 | 24   | Acceptable     | Acceptable     | Acceptable | Acceptable | Acceptable | Acceptable | NA         | 9 |
| Long L       |    | 50 | 50 |      | Acceptable     | Acceptable     | Acceptable | Acceptable | Acceptable | Acceptable | NA         | 9 |

|                   |    |    |    |  |            |                |            |                   |            |            |    |   |
|-------------------|----|----|----|--|------------|----------------|------------|-------------------|------------|------------|----|---|
|                   |    |    |    |  |            |                |            |                   |            |            |    |   |
| Death             |    |    |    |  |            |                |            |                   |            |            |    |   |
| Tang N            | 41 | 54 | 54 |  | Acceptable | Acceptable     | Acceptable | Acceptable        | Acceptable | Acceptable | NA | 8 |
| Tian S            |    | 49 | 48 |  | Acceptable | Acceptable     | Acceptable | Acceptable        | Acceptable | Acceptable | NA | 9 |
| Wu C              | 33 | 64 | 51 |  | Acceptable | Acceptable     | Acceptable | Acceptable        | Acceptable | Acceptable | NA | 9 |
| Chen T b          | 42 | 53 | 55 |  | Acceptable | Acceptable     | Acceptable | Acceptable        | Acceptable | Acceptable | NA | 9 |
| Meng Y            | 34 | 51 | 57 |  | Acceptable | Acceptable     | Acceptable | Acceptable        | Acceptable | Acceptable | NA | 8 |
| Nikpouragh<br>dam | 11 | 66 | 56 |  | Acceptable | Acceptable     | Acceptable | Acceptable        | Acceptable | Acceptable | NA | 9 |
| Richardson        | 94 | 60 | 63 |  | Acceptable | Acceptable     | Acceptable | Acceptable        | Acceptable | Acceptable | NA | 9 |
| Yan, Y            | 49 | 59 | 63 |  | Acceptable | not acceptable | Acceptable | Acceptable        | Acceptable | Acceptable | NA | 8 |
| Xu B              |    | 55 | 61 |  | Acceptable | Acceptable     | Acceptable | Acceptable        | Acceptable | Acceptable | NA | 9 |
| Zhang J c         | 37 | 48 | 56 |  | Acceptable | Acceptable     | Acceptable | Acceptable        | Acceptable | Acceptable | NA | 9 |
| Du R H            |    | 54 | 58 |  | Acceptable | Acceptable     | Acceptable | Acceptable        | Acceptable | Acceptable | NA | 9 |
| Yang R            | 42 | 51 | 55 |  | Acceptable | Acceptable     | Acceptable | Acceptable        | Acceptable | Acceptable | NA | 7 |
| Chen R            |    | 57 |    |  | Acceptable | not acceptable | Acceptable | Not<br>Acceptable | Acceptable | Acceptable | na | 7 |
| Tomlins J         |    | 63 | 73 |  | Acceptable | Acceptable     | Acceptable | Not<br>Acceptable | Acceptable | Acceptable | NA | 8 |

| 70 and above versus less than 70 |               |       |             |          |                                  |      |                  |        |        |                    |    |              |                    |                     |
|----------------------------------|---------------|-------|-------------|----------|----------------------------------|------|------------------|--------|--------|--------------------|----|--------------|--------------------|---------------------|
|                                  | Author        | RR    | country     | region   | city                             | n    | publication date | Start  | End    | recruitment window | FU | study design | clinical setting   | Diagnostic modality |
| Infection                        |               |       |             |          |                                  |      |                  |        |        |                    |    |              |                    |                     |
|                                  | Zhu W         | 1,1   | China       | Anhui    |                                  | 116  | 10-mrt           | 24-jan | 20-feb | 27                 |    | cohort       | Hospital           | PCR                 |
|                                  | Liu R a       | 1,75  | China       | Hubei    | Wuhan                            | 4880 | 7-mrt            | 22-jan | 14-feb | 23                 |    | cohort       | Hospital           | PCR                 |
|                                  | Shen N        | 1,56  | China       | Hubei    | Wuhan                            | 5630 | 30-apr           | 22-jan | 18-feb |                    | 27 | cohort       | Hospital           | PCR                 |
|                                  | KDC Resp Team | 1,36  | South Korea |          |                                  | 2370 |                  |        |        |                    | 46 | cohort       | General population |                     |
| severe                           |               |       |             |          |                                  |      |                  |        |        |                    |    |              |                    |                     |
|                                  | Zhang J a     | 2,01  | China       | Hubei    | Wuhan                            | 140  | 18-feb           | 16-jan | 3-feb  | 18                 |    | cohort       | Hospital           | PCR                 |
|                                  | Qian GQ       | 11,33 | China       | Zhejiang |                                  | 91   | 17-mrt           | 20-jan | 11-feb | 22                 | 27 | cohort       | Hospital           | PCR                 |
|                                  | Zhang G a     | 1,31  | China       | Hubei    | Wuhan                            | 95   | 26-mrt           | 16-jan | 25-feb | 40                 | 46 | cohort       | Hospital           | PCR                 |
|                                  | Liu Y         | 2,35  | China       |          | Shanghai                         | 221  | 28-mei           |        |        |                    |    | cohort       | Hospital           | PCR                 |
|                                  | Chen T b      | 1,06  | China       | Hubei    | Wuhan                            | 203  | 7-apr            | 1-jan  | 10-feb | 40                 | 50 | cohort       | Hospital           | PCR                 |
|                                  | Lyu P         | 1,06  | China       | Henan    | Zhengzhou                        | 51   | 17-apr           | 15-jan | 24-feb | 40                 | 40 | cohort       | Hospital           | PCR                 |
|                                  | Long L        | 2,97  | China       | Hubei    | Jingzhou city and Xiangyang city | 301  | 20-apr           | 16-jan | 24-feb | 39                 | 45 | cohort       | Hospital           | PCR                 |
| ICU                              |               |       |             |          |                                  |      |                  |        |        |                    |    |              |                    |                     |
|                                  | Wang D a      | 2,11  | China       |          | Wuhan                            | 138  | 7-feb            | 1-jan  | 28-jan | 27                 | 33 | cohort       | Hospital           | PCR                 |
|                                  | Zhang G a     | 1,87  | China       | Hubei    | Wuhan                            | 95   | 26-mrt           | 16-jan | 25-feb | 40                 | 46 | cohort       | Hospital           | PCR                 |
|                                  | Wei J F       | 4,37  | China       | Sichuan  |                                  | 103  | 6-apr            | 16-jan | 10-mrt | 54                 |    | cohort       | Hospital           | PCR                 |

|       |                 |      |       |          |                                  |      |        |        |        |    |    |        |          |     |
|-------|-----------------|------|-------|----------|----------------------------------|------|--------|--------|--------|----|----|--------|----------|-----|
|       | Lyu P           | 1,3  | China | Henan    | Zhengzhou                        | 51   | 17-apr | 15-jan | 24-feb | 40 | 40 | cohort | Hospital | PCR |
|       | Long L          | 4,61 | China | Hubei    | Jingzhou city and Xiangyang city | 301  | 20-apr | 16-jan | 24-feb | 39 | 45 | cohort | Hospital | PCR |
| death |                 |      |       |          |                                  |      |        |        |        |    |    |        |          |     |
|       | Tang N          | 3,29 | China | Hubei    | Wuhan                            | 183  | 18-feb | 1-jan  | 3-feb  | 33 | 43 | cohort | Hospital | PCR |
|       | Chen T b        | 6,73 | China | Hubei    | Wuhan                            | 203  | 7-apr  | 1-jan  | 10-feb | 40 | 50 | cohort | Hospital | PCR |
|       | Meng Y          | 3,78 | China | Hubei    | Wuhan                            | 168  | 28-apr | 16-jan | 4-feb  | 19 | 64 | cohort | Hospital | PCR |
|       | Nikpouraghdam M | 3,94 | Iran  |          | Teheran                          | 2968 | 19-apr | 19-feb | 15-apr | 56 | 73 | cohort | Hospital | PCR |
|       | Richardson S    | 3,38 | US    | New York |                                  | 5700 | 22-apr | 1-mrt  | 4-apr  | 34 | 34 | cohort | Hospital | PCR |

| 70 and above versus less than 70 |                 |         |          |            | NOS             |                         |                   |                    |                        |                          |                   |                 |
|----------------------------------|-----------------|---------|----------|------------|-----------------|-------------------------|-------------------|--------------------|------------------------|--------------------------|-------------------|-----------------|
| Author                           | % comorbidities | % males | mean age | % BMI > 25 | Case definition | Case representativeness | Control selection | control definition | exposure ascertainment | comparable ascertainment | non response rate | overall quality |
| Infection                        |                 |         |          |            |                 |                         |                   |                    |                        |                          |                   |                 |
| Zhu W                            |                 | 56      | 40       | 23         | Acceptable      | Acceptable              | Acceptable        | Acceptable         | Acceptable             | Acceptable               | NA                | 9               |
| Liu R a                          |                 | 46      |          |            | Acceptable      | Acceptable              | Acceptable        | Not acceptable     | Acceptable             | Acceptable               | NA                | 7               |
| Shen N                           |                 | 47      | 49       |            | Acceptable      | Acceptable              | Acceptable        | Acceptable         | Acceptable             | Acceptable               | acceptable        | 9               |
| KDC Resp Team                    |                 | 45      |          |            | Not Acceptable  | Acceptable              | Acceptable        | Acceptable         | Acceptable             | Acceptable               | NA                | 7               |
| severe                           |                 |         |          |            |                 |                         |                   |                    |                        |                          |                   |                 |
| Zhang J a                        | 64              | 51      | 57       |            | Acceptable      | Acceptable              | Acceptable        | Acceptable         | Acceptable             | Acceptable               | acceptable        | 8               |
| Qian GQ                          |                 | 41      | 50       |            | Acceptable      | Acceptable              | Acceptable        | Acceptable         | Acceptable             | Acceptable               | NA                | 9               |
| Zhang G a                        |                 | 56      | 49       |            | Acceptable      | Acceptable              | Acceptable        | Acceptable         | Acceptable             | Acceptable               | NA                | 9               |
| Liu Y                            |                 | 52      |          |            | Not acceptable  | Acceptable              | Acceptable        | Acceptable         | Acceptable             | Acceptable               | NA                | 8               |
| Chen T b                         | 42              | 53      | 55       |            | Acceptable      | Acceptable              | Acceptable        | Acceptable         | Acceptable             | Acceptable               | NA                | 9               |
| Lyu P                            | 33              | 57      | 54       |            | Acceptable      | Acceptable              | Acceptable        | Acceptable         | Acceptable             | Acceptable               | NA                | 6               |
| Long L                           |                 | 50      | 50       |            | Acceptable      | Acceptable              | Acceptable        | Acceptable         | Acceptable             | Acceptable               | NA                | 9               |
| ICU                              |                 |         |          |            |                 |                         |                   |                    |                        |                          |                   |                 |



|                     |    |    |    |  |            |            |            |            |            |            |    |   |
|---------------------|----|----|----|--|------------|------------|------------|------------|------------|------------|----|---|
| Wang D a            | 46 | 54 | 57 |  | Acceptable | Acceptable | Acceptable | Acceptable | Acceptable | Acceptable | NA | 9 |
| Zhang G a           |    | 56 | 49 |  | Acceptable | Acceptable | Acceptable | Acceptable | Acceptable | Acceptable | NA | 9 |
| Wei J F             |    | 54 | 49 |  | Acceptable | Acceptable | Acceptable | Acceptable | Acceptable | Acceptable | NA | 9 |
| Lyu P               | 33 | 57 | 54 |  | Acceptable | Acceptable | Acceptable | Acceptable | Acceptable | Acceptable | NA | 6 |
| Long L              |    | 50 | 50 |  | Acceptable | Acceptable | Acceptable | Acceptable | Acceptable | Acceptable | NA | 9 |
| Death               |    |    |    |  |            |            |            |            |            |            |    |   |
| Tang N              | 41 | 54 | 54 |  | Acceptable | Acceptable | Acceptable | Acceptable | Acceptable | Acceptable | NA | 8 |
| Chen T b            | 42 | 53 | 55 |  | Acceptable | Acceptable | Acceptable | Acceptable | Acceptable | Acceptable | NA | 9 |
| Meng Y              | 34 | 51 | 57 |  | Acceptable | Acceptable | Acceptable | Acceptable | Acceptable | Acceptable | NA | 8 |
| Nikpouraghda<br>m M | 11 | 66 | 56 |  | Acceptable | Acceptable | Acceptable | Acceptable | Acceptable | Acceptable | NA | 9 |
| Richardson S        | 94 | 60 | 63 |  | Acceptable | Acceptable | Acceptable | Acceptable | Acceptable | Acceptable | NA | 9 |
